# Supplementary material for: Missing levels lead to additional lines: the influence of nuclear spin statistics on femtosecond degenerate four wave mixing spectroscopy of polyatomic systems
Source: Royal Society of Chemistry journal article supplement (doi:10.1039/b510363k), 2005-01-01
Supplement: b510363k.pdf [file b510363k.pdf]

**Missing levels lead to additional lines:  
the influence of nuclear spin statistics on femtosecond degenerate four wave mixing spectroscopy of polyatomic systems**

C. Riehn,<sup>\*a</sup> M. I. Kunitski,<sup>a</sup> V. V. Matylitsky,<sup>a</sup> M. F. Gelin<sup>b</sup> and B. Brutschy<sup>a</sup>

<sup>a</sup> *Johann Wolfgang Goethe-University Frankfurt/M., Institute of Physical and Theoretical Chemistry,  
Marie-Curie-Str. 11, D-60439 Frankfurt/M, Germany.*

<sup>b</sup> *Department of Chemistry & Biochemistry, University of Maryland,  
0107 Chemistry Building, College Park, MD 20742-4454, U.S.A.*

---

\*Corresponding author: email: [riehn@chemie.uni-frankfurt.de](mailto:riehn@chemie.uni-frankfurt.de)

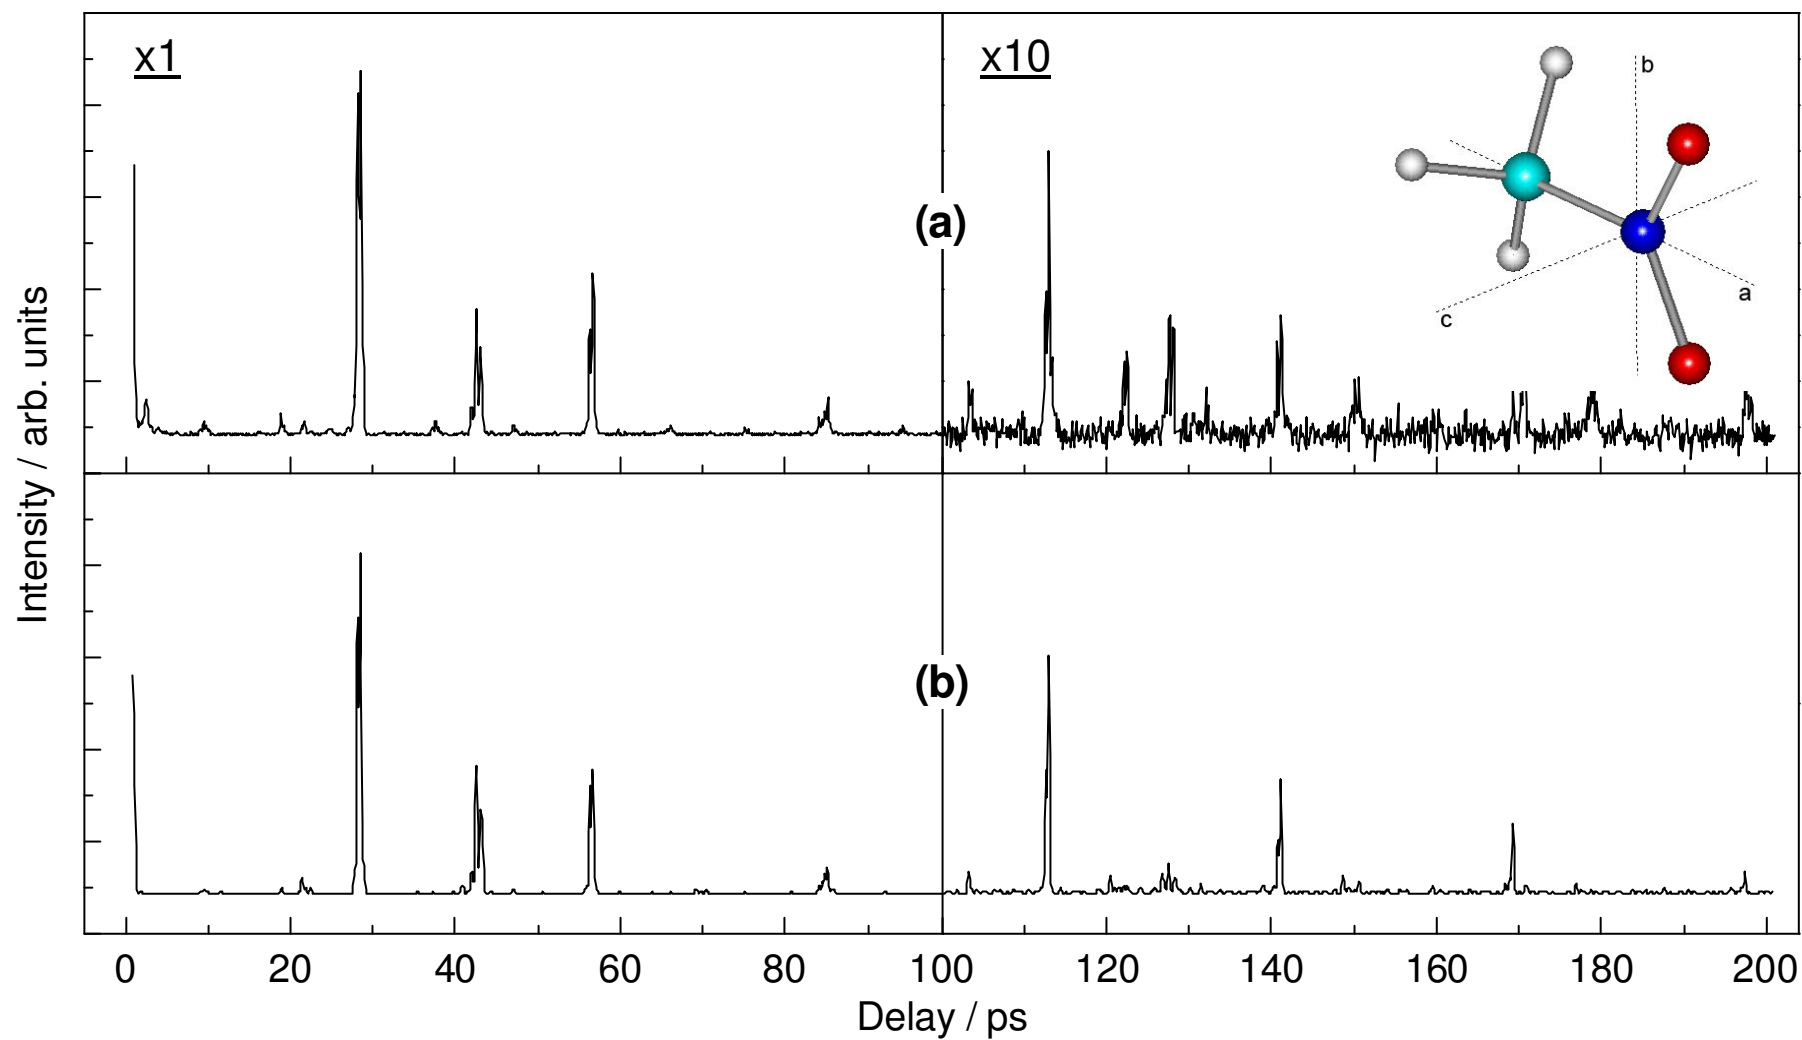

**Picture.** Experimental (a) and simulated (b) fs DFWM spectra of nitromethane
